# Supplementary material for: Shaping calcite crystals by customized self-assembling pseudopeptide foldamers
Source: Royal Society of Chemistry journal article supplement (doi:10.1039/c4ce01569j), 2014-10-27
Supplement: c4ce01569j1.pdf [file c4ce01569j1.pdf]

## Supplementary Information

### Shaping calcite crystals by customized self-assembling pseudopeptide foldamers

Claudia Tomasini, Nicola Castellucci, Valentina C. Caputo, Lorenzo Milli, Giulia Battistelli,  
Simona Fermani, Giuseppe Falini

Dipartimento di Chimica “G. Ciamician”, Alma Mater Studiorum Università di Bologna, via  
Selmi 2, I-40126 Bologna, Italy.

|                         |         |
|-------------------------|---------|
| Figure S1: DLS profiles | pag. S2 |
| Figure S2: XRD patterns | pag. S3 |
| Figure S3 XRD patterns  | pag. S3 |
| Figure S4: XRD patterns | pag. S4 |
| Figure S5 FTIR spectra  | pag. S5 |
| Figure S6: FTIR spectra | pag. S5 |
| Figure S7: SEM images   | pag. S6 |

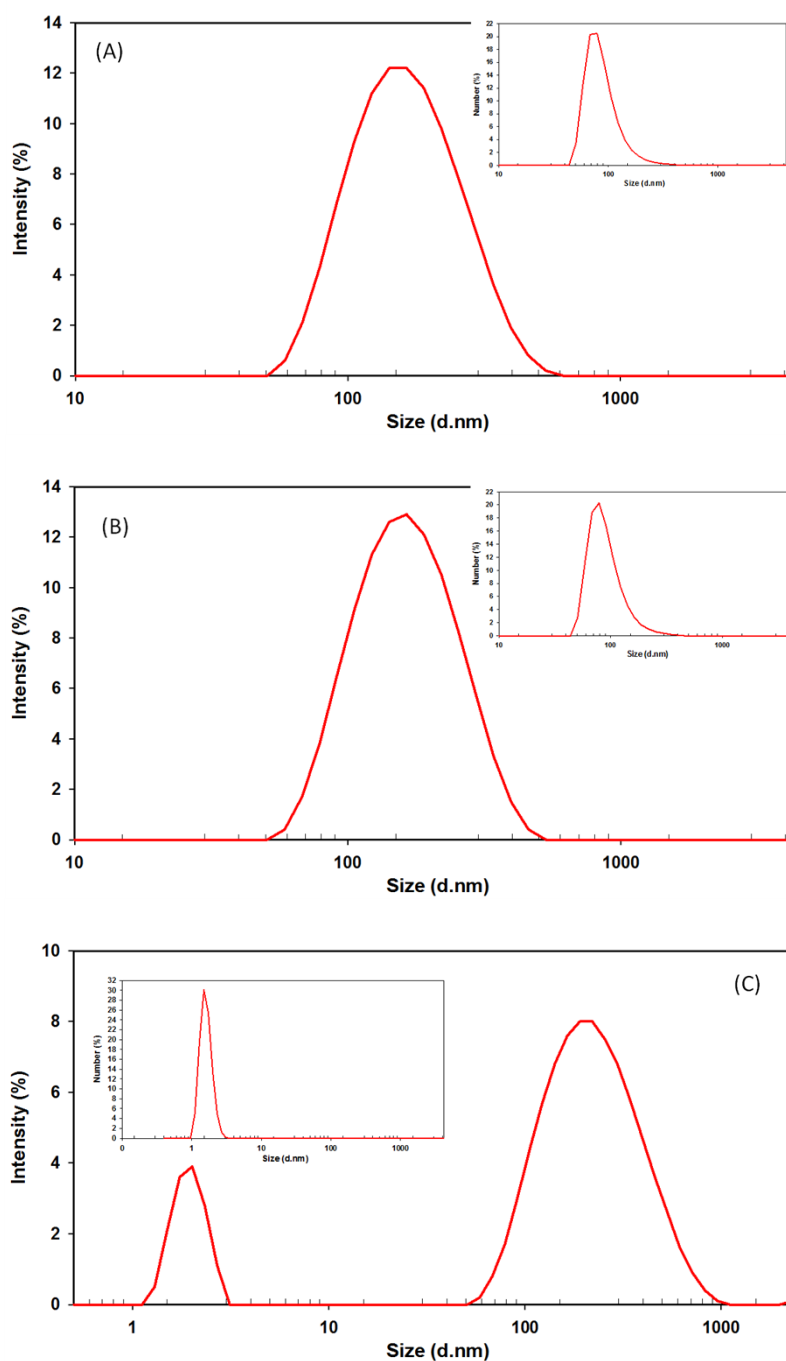

**Figure S1.** SDS profiles of size distribution numbers as a function of the Intensity (%) of the molecule **2** particles solution after 450 nm filtration. (A) 1 mM solution, 5 mM solution (B) and (C) 10 mM solution. In the inset in each figure the SDS profiles of size distribution numbers as a function of the number (%) is reported as well.

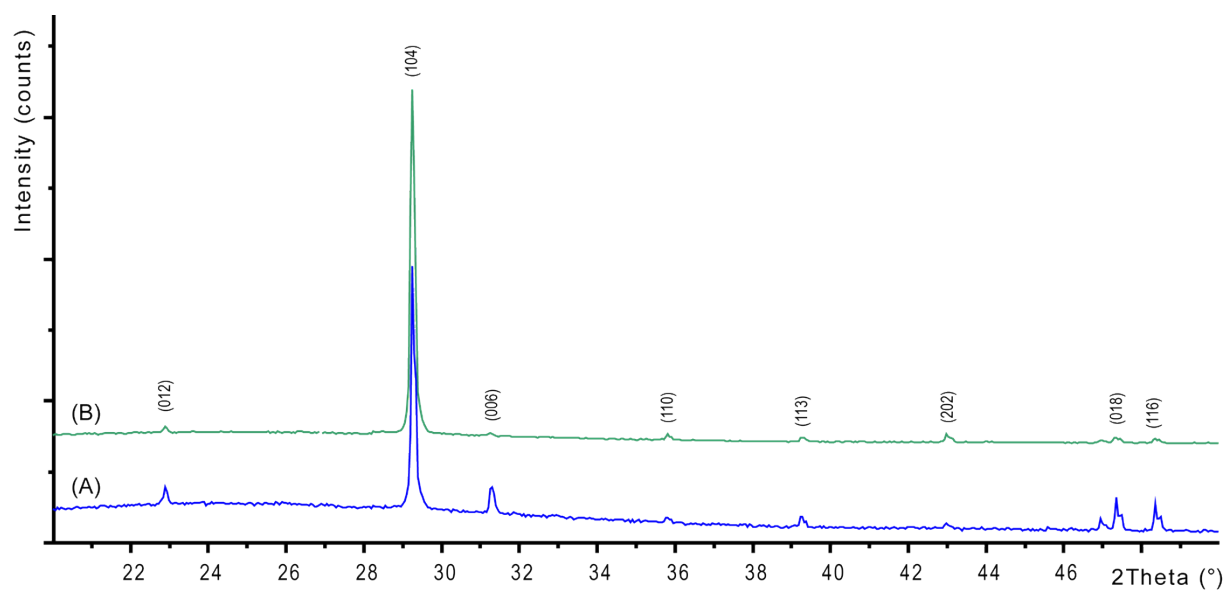

**Figure S2.** XRD patterns of calcium carbonate precipitates from a 9:1 (v/v) water/ethanol mixture containing 10 mM (A) or 100 mM (B)  $\text{CaCl}_2$ . The Miller indexes of calcite are reported.

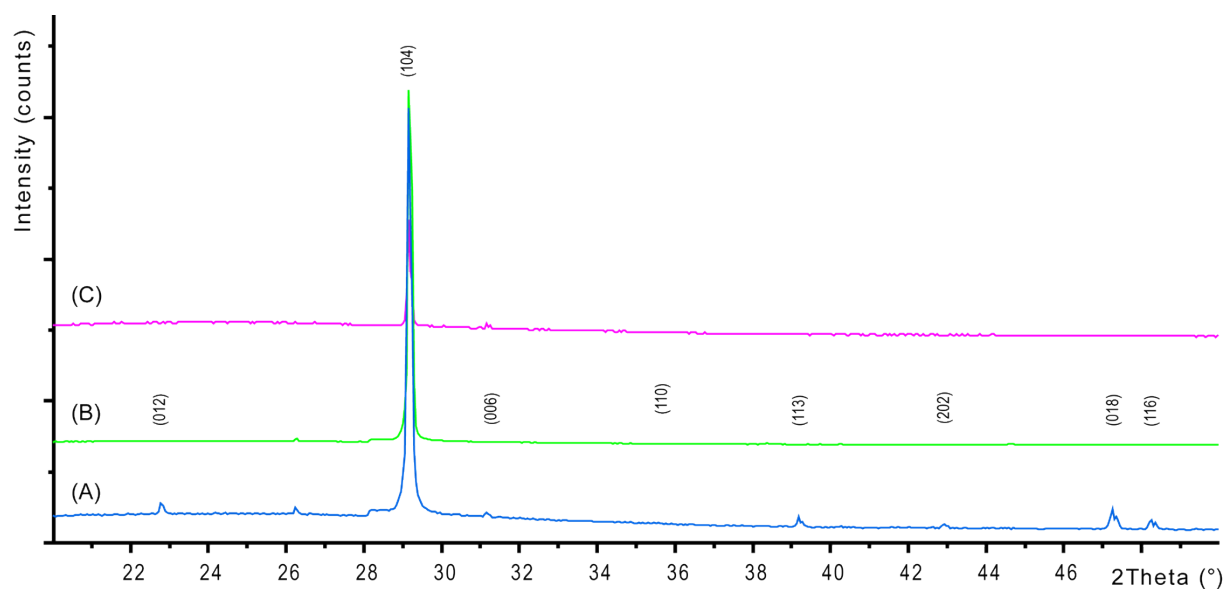

**Figure S3.** XRD patterns of calcium carbonate precipitates from a 9:1 (v/v) water/ethanol mixture containing 10 mM  $\text{CaCl}_2$  in the presence of 1 mM (A), 5 mM (B) or 10 mM (C) of molecule **1**. The Miller indexes of calcite are reported.

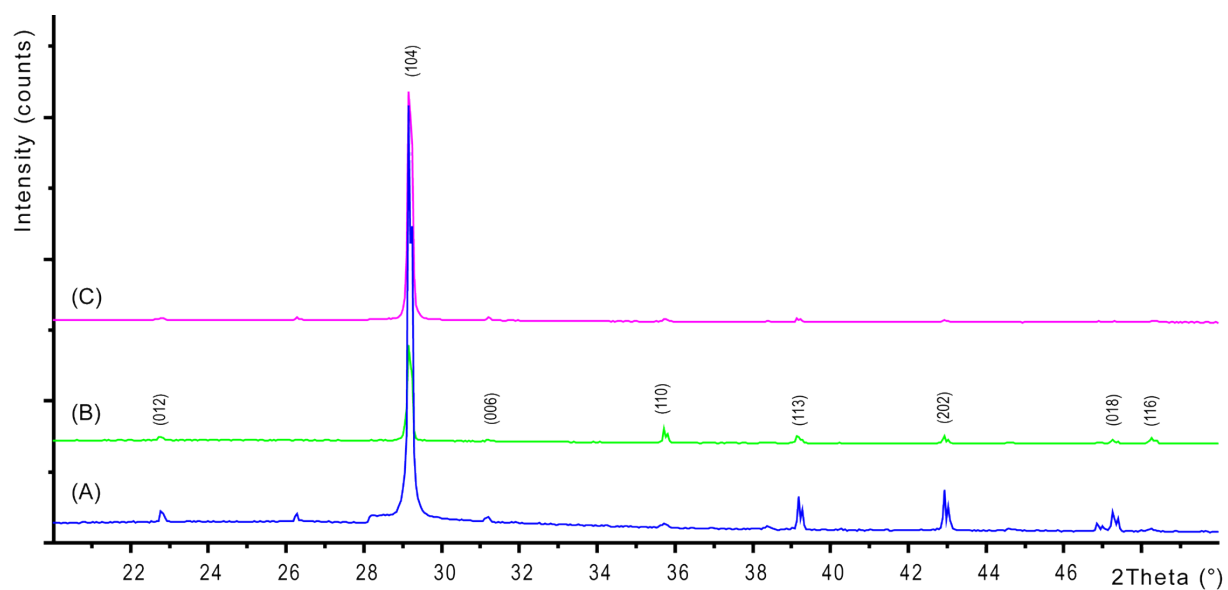

**Figure S4.** XRD patterns of calcium carbonate precipitates from a 9:1 (v/v) water/ethanol mixture containing 10 mM  $\text{CaCl}_2$  in the presence of 1 mM (A), 5 mM (B) or 10 mM (C) of molecule **2**. The Miller indexes of calcite are reported.

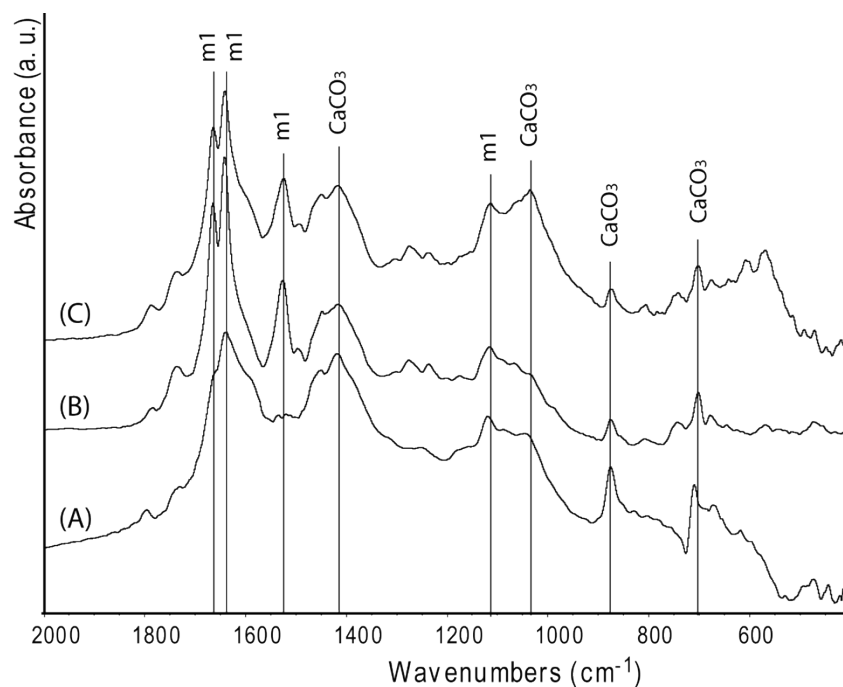

**Figure S5.** FTIR spectra of calcium carbonate precipitates from a 9:1 (v/v) water/ethanol mixture containing 10 mM  $\text{CaCl}_2$  in the presence of 1 mM (A), 5 mM (B) or 10 mM (C) of molecule **1**. The absorption bands due to molecule **1** (m1) and calcite ( $\text{CaCO}_3$ ) are indicated.

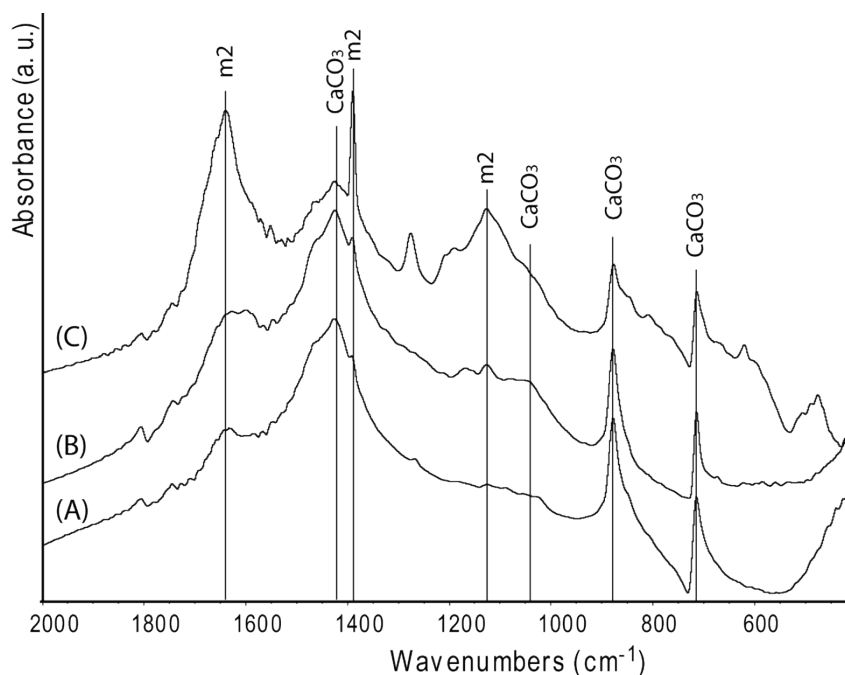

**Figure S6.** FTIR spectra of calcium carbonate precipitates from a 9:1 (v/v) water/ethanol mixture containing 10 mM  $\text{CaCl}_2$  in the presence of 1 mM (A), 5 mM (B) or 10 mM (C) of molecule **2**. The absorption bands due to molecule **2** (m2) and calcite ( $\text{CaCO}_3$ ) are indicated.

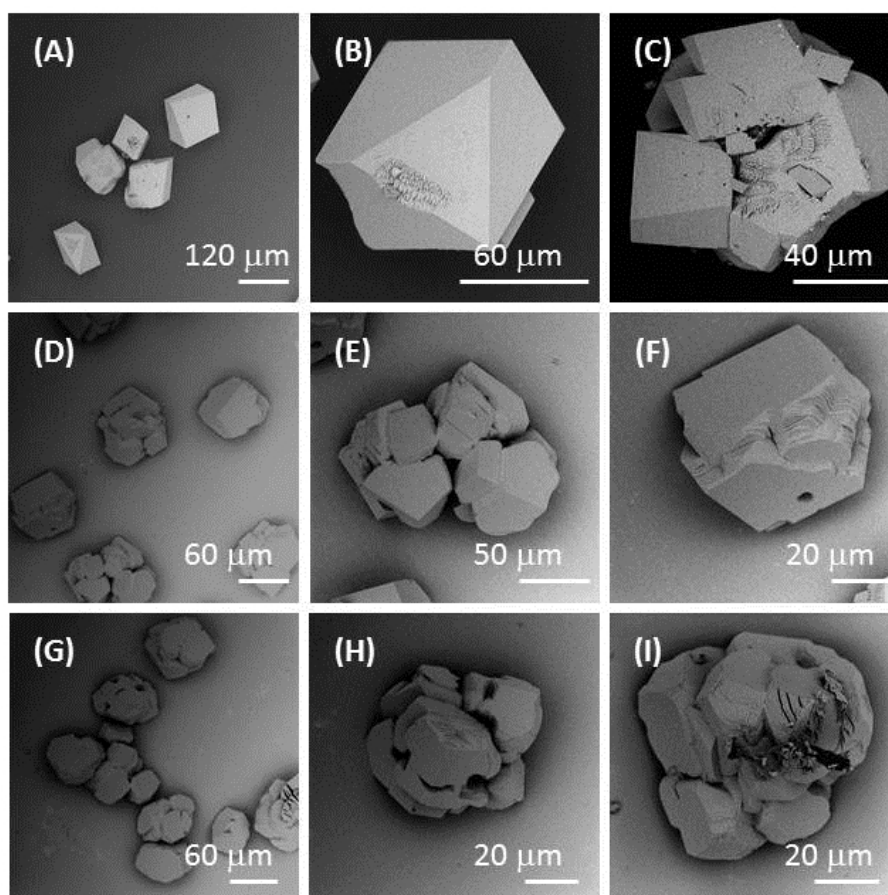

**Figure S7.** SEM images of calcium carbonate precipitates obtained from a 100 mM  $\text{CaCl}_2$  solution in the presence of 1 mM (A-C), 5 mM (D-F) or 10 mM (G-I) of molecule **2**.
